# Supplementary material for: Revealing enterovirus infection in chronic human disorders: An integrated diagnostic approach
Source: PubMed Central journal article supplement (PMC5504018; doi:10.1038/s41598-017-04993-y), 2017-07-10
Supplement: 41598_2017_4993_MOESM1_ESM.pdf [file 41598_2017_4993_MOESM1_ESM.pdf]

**SUPPLEMENTARY INFORMATION**

**REVEALING ENTEROVIRUS INFECTION IN CHRONIC HUMAN DISORDERS:**

**AN INTEGRATED DIAGNOSTIC APPROACH**

**Angelo GENONI<sup>1</sup>, Filippo CANDUCCI<sup>1</sup>, Agostino ROSSI<sup>1</sup>, Francesco BROCCOLO<sup>2</sup>, Konstantin CHUMAKOV<sup>3</sup>, Giorgio BONO<sup>4</sup>,  
Jorge SALERNO-URIARTE<sup>5</sup>, Alessandro SALVATONI<sup>6</sup>, Alberto PUGLIESE<sup>7</sup>, and Antonio TONIOLO<sup>1\*</sup>**

**Supplementary Table S1.** List of consumables, cell lines, culture media, molecular biology reagents, chemicals, antiviral antibodies, commercial diagnostic kits for enterovirus detection.

**Supplementary Table S2.** Virus strains, plasmids, human cell lines, leukocytes of blood donors utilized as controls.

**Supplementary Table S3.** Oligonucleotide primer pairs utilized in this study (5'-3').

**Supplementary Table S4.**

A) SYBR green PCR assay of quantitated pU57 DNA plasmids comprising the 5'UTR region of four different enteroviruses.

B) Enterovirus genome copy number/ml in medium of AV3 cell cultures infected with samples of selected PPS and T1D cases.

**Supplementary Figure S1.**

Uncropped images of 2.2% agarose gels represented in panel A of Figure 2 (end-point PCR with the 5UTR-Tok primer pair).

Amplification of quantitated plasmids containing the 5'UTR region of CV-A6, CV-B3, PV1, EV-D68 enterovirus types. The first lane of each image contains a DNA ladder of the following composition (bottom up): 50bp, 100bp, 150bp, 200bp, 300bp, 500bp, 800bp, 1,500bp.

**Supplementary Figure S2.**

Uncropped images of 2.2% agarose gels represented in panel B of Figure 2 (end-point PCR with the 5UTR-C primer pair). Amplification of quantitated plasmids containing the 5'UTR region of CV-A6, CV-B3, PV1, EV-D68 enterovirus types.

The first lane of each image contains a DNA ladder of the following composition (bottom up): 50bp, 100bp, 150bp, 200bp, 300bp, 500bp, 800bp, 1,500bp.

**Supplementary Table S1. List of consumables, cell lines, culture media, molecular biology reagents, chemicals, antiviral antibodies, commercial diagnostic kits for enterovirus detection.**

| Description                                                                                                                                                                                                                                                                                                                                                                                                                                                                                                                                    | Purchased from                                                            |
|------------------------------------------------------------------------------------------------------------------------------------------------------------------------------------------------------------------------------------------------------------------------------------------------------------------------------------------------------------------------------------------------------------------------------------------------------------------------------------------------------------------------------------------------|---------------------------------------------------------------------------|
| <b>Blood test tubes</b>                                                                                                                                                                                                                                                                                                                                                                                                                                                                                                                        |                                                                           |
| Vacutainer K <sub>2</sub> EDTA tube, Vacutainer K <sub>2</sub> EDTA plasma preparation tube                                                                                                                                                                                                                                                                                                                                                                                                                                                    | BD (Milano, Italy)                                                        |
| <b>Plasticware</b>                                                                                                                                                                                                                                                                                                                                                                                                                                                                                                                             |                                                                           |
| Flasks (T-25; T-75); 12-well and 6-well multiplates; cell scrapers; pipettes                                                                                                                                                                                                                                                                                                                                                                                                                                                                   | Thermo Fisher Scientific-Corning (Monza, Italy)                           |
| Millex syringe filter units, PVDF pore size 0.45, 0.22, 0.10 µm; Millicell EZ 4-well glass slides                                                                                                                                                                                                                                                                                                                                                                                                                                              | Merck-Millipore (Vimodrone, Italy)                                        |
| <b>Cell culture</b>                                                                                                                                                                                                                                                                                                                                                                                                                                                                                                                            |                                                                           |
| Cell lines: AV3; RD; HEL-299; LLC-MK2                                                                                                                                                                                                                                                                                                                                                                                                                                                                                                          | European Collection of Authenticated Cell Cultures (ECACC, Salisbury, UK) |
| Fetal bovine serum (FBS); DME/F12 medium with HEPES; L-Glutamine; Pyruvate; Penicillin-Gentamicin; Hank's balanced salt solution (HBSS); Dulbecco Phosphate-buffered saline (DPBS); Trypsin-EDTA                                                                                                                                                                                                                                                                                                                                               | LifeTechnologies-Gibco (Monza, Italy)                                     |
| XerumFree (serum substitute)                                                                                                                                                                                                                                                                                                                                                                                                                                                                                                                   | TNC Bio (Eindhoven, The Netherlands)                                      |
| Histopaque cell separation medium (density 1.077 and 1.119 g/ml); Bovine serum albumin (BSA); Bovine skin collagen solution; Collagenase type IV; Dispase-I                                                                                                                                                                                                                                                                                                                                                                                    | Sigma-Aldrich (Milano, Italy)                                             |
| PANTA antibiotic mixture (Polymyxin B; Amphotericin B; Nalidixic Acid; Trimethoprim; Azlocillin)                                                                                                                                                                                                                                                                                                                                                                                                                                               | BD (Milano, Italy)                                                        |
| MycoAlert Plus Mycoplasma Detection Kit; Accutase (cell detachment enzymes)                                                                                                                                                                                                                                                                                                                                                                                                                                                                    | Euroclone-Lonza (Pero, Italy)                                             |
| <b>Molecular biology</b>                                                                                                                                                                                                                                                                                                                                                                                                                                                                                                                       |                                                                           |
| GoTaq DNA hot start DNA polymerase and master mix; DNA molecular weight markers; Tris-Acetate EDTA buffer (TAE); Agarose; High-resolution agarose                                                                                                                                                                                                                                                                                                                                                                                              | Promega Italia (Milano, Italy)                                            |
| Reagents and disposables for the m2000sp automated instrument; DNA and RNA preparation kits; reagent vessels; deep well plates; disposable tips                                                                                                                                                                                                                                                                                                                                                                                                | Abbott Molecular (Rome, Italy)                                            |
| Custom oligonucleotide primers; Water (PCR-grade); Tris-EDTA buffer pH 8.0 (TE); low-EDTA (0.1 mM) TE buffer pH 8.0; Elution (10 mM Tris-Cl) buffer EB pH 8.5                                                                                                                                                                                                                                                                                                                                                                                  | Sigma-Aldrich (Milano, Italy)                                             |
| Superscript III and Superscript IV reverse transcriptase with VILO master mix [containing ribonuclease inhibitor, helper and stabilizer proteins, random hexamer primers OR mixture of random hexamer primers plus oligo (dT)18; dNTPs; MgCl <sub>2</sub> ]; Platinum Taq hot start DNA polymerase and PCR Master Mix; Platinum GC Enhancer                                                                                                                                                                                                    | Thermo Fisher Scientific-Invitrogen (Monza, Italy)                        |
| Brilliant II SYBR QPCR Master Mix with ROX passive reference dye                                                                                                                                                                                                                                                                                                                                                                                                                                                                               | Agilent Technologies (Cernusco sul Naviglio, Italy)                       |
| GelRed stain                                                                                                                                                                                                                                                                                                                                                                                                                                                                                                                                   | DBA Italia-Biotium (Segrate, Italy)                                       |
| FlashGel - DNA electrophoresis screening system                                                                                                                                                                                                                                                                                                                                                                                                                                                                                                | Euroclone-Lonza (Pero, Italy)                                             |
| BigDye Terminator V1.1 Cycle Sequencing Kit; Centri-Spin purification columns                                                                                                                                                                                                                                                                                                                                                                                                                                                                  | Thermo Fisher Scientific-AppliedBiosystems (Monza, Italy)                 |
| <b>Chemicals (molecular biology grade)</b>                                                                                                                                                                                                                                                                                                                                                                                                                                                                                                     |                                                                           |
| Ethanol; Isopropanol; Dimethyl sulfoxide (DMSO); N,N-Dimethylformamide; Acetone; Paraformaldehyde (PFA); Triton X100; Tween-20; Na-Azide                                                                                                                                                                                                                                                                                                                                                                                                       | Sigma-Aldrich (Milano, Italy)                                             |
| <b>Virus antibodies and indirect immunofluorescence</b>                                                                                                                                                                                                                                                                                                                                                                                                                                                                                        |                                                                           |
| Mouse monoclonal antibodies (MAB): 9D5 (panenterovirus directed to the VP1 capsid protein); Coxsackie A9; Coxsackie A24 (cross reacting with Echovirus 34); Coxsackie B Blend; Coxsackie B1; Coxsackie B2; Coxsackie B3; Coxsackie B4; Coxsackie B5; Coxsackie B6; Echovirus Blend 4, 6, 9, 11, 30, 34 (cross reacting with Coxsackie A24); Echovirus 4; Echovirus 6; Echovirus 9; Echovirus 11; Echovirus 30; Enterovirus 70; Enterovirus 71 (cross reacting with Coxsackie A16); Poliovirus Blend; Poliovirus-1; Poliovirus-2; Poliovirus-3. | Merck-Millipore (Vimodrone, Italy)                                        |
| Mouse MAb 5D-8.1 (panenterovirus directed to the VP1 capsid protein)                                                                                                                                                                                                                                                                                                                                                                                                                                                                           | Dako (Milano, Italy)                                                      |
| Mouse MAb B324M (panenterovirus directed to the VP1 capsid protein)                                                                                                                                                                                                                                                                                                                                                                                                                                                                            | Acris Antibodies (Herford, Germany)                                       |
| Mouse MAbs 3D-02 and 3D-05 (panenterovirus directed to the 3Dpol enzyme)                                                                                                                                                                                                                                                                                                                                                                                                                                                                       | Our own laboratory                                                        |
| Rabbit polyclonal antibody to Poliovirus-1, Poliovirus-2, Poliovirus-3; Human-Monkey MAb to Poliovirus 1 and 2                                                                                                                                                                                                                                                                                                                                                                                                                                 | Konstantin Chumakov (FDA, Silver Spring, MD)                              |
| Alexa Fluor 488 goat anti-mouse IgG; FITC goat anti-Rabbit IgG; ProLong antifade; Evans Blue; DAPI                                                                                                                                                                                                                                                                                                                                                                                                                                             | Thermo Fisher Scientific (Monza, Italy)                                   |
| FITC goat anti-Baboon IgG; FITC goat anti-Human IgG (Fc region)                                                                                                                                                                                                                                                                                                                                                                                                                                                                                | Antibodies Online (Aachen, Germany)                                       |
| <b>Commercial research use only (RUO) real time RT-PCR assays (enterovirus and poliovirus )</b>                                                                                                                                                                                                                                                                                                                                                                                                                                                |                                                                           |
| [A] Coxsackie RT-PCR; [B] Poliovirus RT-PCR                                                                                                                                                                                                                                                                                                                                                                                                                                                                                                    | DID-Liferiver (Milano, Italy)                                             |
| [C] Enterovirus LC                                                                                                                                                                                                                                                                                                                                                                                                                                                                                                                             | Qiagen-Artus (Milano, Italy)                                              |
| [D] Enterovirus Q-PCR                                                                                                                                                                                                                                                                                                                                                                                                                                                                                                                          | Nanogen (Trezzaano, Italy)                                                |
| [E] Enterovirus 1-RQ                                                                                                                                                                                                                                                                                                                                                                                                                                                                                                                           | Experteam (Venezia, Italy)                                                |
| [F] Enterovirus RT-PCR; [G] Enterovirus-C RT-PCR; [H] Poliovirus RT-PCR                                                                                                                                                                                                                                                                                                                                                                                                                                                                        | Sacace Biotech (Como, Italy)                                              |

**Supplementary Table S2. Virus strains, plasmids, human cell lines, leukocytes of blood donors utilized as controls.**

| Virus / Human cells                        | EV Species / designation | Strain / Source                           |
|--------------------------------------------|--------------------------|-------------------------------------------|
| CV-A2                                      | A                        | PR92 - University of Parma, Italy         |
| CV-A6 Hyogo9426 (5'UTR pUC57 plasmid)      | A                        | GenScript, Piscataway, NJ                 |
| CV-A16                                     | A                        | PR87 - University of Parma, Italy         |
| EV-A71                                     | A                        | QCMD <sup>a</sup>                         |
| CV-A9                                      | B                        | Griggs – ATCC <sup>b</sup>                |
| CV-B1                                      | B                        | Conn-1 – ATCC                             |
| CV-B2                                      | B                        | Ohio-1 – ATCC                             |
| CV-B3                                      | B                        | Nancy – ATCC                              |
| CV-B3 Nancy (5'UTR pUC57 plasmid)          | B                        | GenScript                                 |
| CV-B4                                      | B                        | JBV – ATCC                                |
| CV-B5                                      | B                        | Faulkner - ATCC                           |
| CV-B6                                      | B                        | Schmitt – ATCC                            |
| Echo11                                     | B                        | Gregory – ATCC                            |
| Echo16                                     | B                        | QCMD                                      |
| Echo30 RNA                                 | B                        | FIN/10/E3867/RDA/A2164 – THL <sup>c</sup> |
| CV-A1 RNA                                  | C                        | Argene <sup>d</sup>                       |
| CV-A19                                     | C                        | PR98 - University of Parma, Italy         |
| CV-A24                                     | C                        | QCMD                                      |
| EV-C109                                    | C                        | HSR, Milano, Italy                        |
| PV-1                                       | C                        | Chat-1 vaccine – ATCC                     |
| PV-1                                       | C                        | Sabin-1 vaccine – ATCC                    |
| PV-1 RNA                                   | C                        | FIN/10/E3481/L20B85432-3 – THL            |
| PV-1 Mahoney (5'UTR pUC57 plasmid)         | C                        | GenScript                                 |
| PV-2                                       | C                        | Sabin-2 vaccine – ATCC                    |
| PV-2 RNA                                   | C                        | FIN/10/E3481/L20B85412-3 – THL            |
| PV-3                                       | C                        | Sabin-3 vaccine – ATCC                    |
| PV-3 RNA                                   | C                        | FIN/10/E3856/RDA87330-1 – THL             |
| EV-D68 RNA                                 | D                        | Argene                                    |
| EV-D68 SZ04/CHN/2015 (5'UTR pUC57 plasmid) | D                        | GenScript                                 |
| EV-D94                                     | D                        | E210 – THL                                |
| Parechovirus-3 (PEV-3)                     | quality control strain   | QCMD                                      |
| Encephalomyocarditis virus (EMCV)          | D-clone                  | J-W Yoon - NIH, Bethesda, MD              |
| HIV-1                                      | lab strain               | P1 - ISS, Roma, Italy                     |
| HCV                                        | clinical sample          | GT-1b - Microbiology, Varese, Italy       |
| Measles, Mumps, Rubella                    | combined vaccine         | GSK, Siena, Italy                         |
| HeLa cell line - total RNA                 | –                        | ECACC <sup>e</sup>                        |
| AV3 cell line - total RNA                  | –                        | ECACC                                     |
| HEL-299 cell line - total RNA              | –                        | ECACC                                     |
| RD cell line - total RNA                   | –                        | ECACC                                     |
| Blood donors (peripheral blood leukocytes) | –                        | Transfusion Medicine, Varese, Italy       |

a. Quality Control Molecular Diagnostics (QCMD), Glasgow, UK.

b. American Type Culture Collection (ATCC); LGC Standards, Sesto San Giovanni, Italy.

c. National Institute for Health and Welfare (THL); Helsinki, Finland (courtesy Dr. Merja Roivainen).

d. bioMérieux-Argene; Bagno a Ripoli, Italy.

e. European Collection of Authenticated Cell Cultures (ECACC); Salisbury, UK.

Supplementary Table S3. Oligonucleotide primer pairs utilized in this study (5'-3').

| Genome region              | Designation                | Sense primer (Fwd)           | Antisense primer (Rev)                | Amplicon size (bp) |
|----------------------------|----------------------------|------------------------------|---------------------------------------|--------------------|
| <b>Enterovirus primers</b> |                            |                              |                                       |                    |
| 5'UTR                      | EV 5UTR-Nij <sup>64</sup>  | TCCTCCGGCCCCTGA              | AATTGTCACCATAAGCAGCCA                 | 156-155            |
|                            | EV 5UTR-Tok <sup>39</sup>  | TCCTCCGGCCCCTGAATGCGGCTAATCC | GAAACACGGWCACCAAAGTASTCG <sup>a</sup> | 119                |
|                            | EV 5UTR-3760 <sup>12</sup> | TGGCTGCGTTGGCGGCC            | TAGCCGCATTAGGGGCGCGGA                 | 112                |
|                            | EV 5UTR-3758 <sup>12</sup> | TTCCTCCGGCCCCTGAATG          | TGAAACACGGGCACCGAAAGTAGT              | 122                |
|                            | EV 5UTR-A                  | GTGTAGATCAGGTCGATGAGTCAC     | ATTGTCACCATAAGCAGCCA                  | 293-296            |
|                            | EV 5UTR-B                  | GACCAAGCACTTCTGTTACCC        | GTCACCATAAGCAGCCAATATA                | 436                |
|                            | EV 5UTR-C                  | GGTGTGAAGAGCCTATTGAGC        | GATTGTCACCATAAGCAGCCA                 | 186-187            |
|                            | EV 5UTR-D                  | TGGTCCAGGCTGCGTT             | AACACGGACACCCAAAGTAGT                 | 210-212            |
| 2C                         | EV 2C-1A                   | ACAGTTCAAGTCCAAATGCCGTAT     | GGGTTTTGGCACAGGTCATC                  | 210                |
|                            | EV 2C-1B                   | TACAGTTCAAGTCCAAATGCCGT      | CTGTACATGGAGATAACNTCNAT               | 430                |
|                            | EV 2C-2                    | CATACAGTTCAAGAGCAAACACCGT    | ATGTTGGGGTACTTGCTAG                   | 1317-1320          |
|                            | EV 2C-3                    | GTTGCGACCAACTTNATTGC         | TTTTGGTTTAGGTCGTCCA                   | 213                |
|                            | EV 2C-4                    | CAGTTCAAGTCCAAATCTCGCAT      | ACTGGTGTATAGAGTTCCTTTTTTC             | 309                |
|                            | EV 2C-5                    | AAGAGCAAACACCGTATTGAACCT     | GGGGTTTTGGCACAGATCATCCAT              | 352                |
| 3Dpol                      | EV 3Dpol-A                 | ATGGTTGCTTACGGAGATGAT        | TTGGCATAGTAGGATGAATCA                 | 214                |
|                            | EV 3Dpol-B                 | GCACTGGGCATCAAGAAGAG         | CCCTGTCTGCTGGTGTGTCAT                 | 719                |
|                            | EV 3Dpol-C                 | CAGGAATAATAACAGGTTTCAGCAGT   | AGTCTTTTCCTGCTTGGGCTA                 | 444                |
|                            | EV 3Dpol-D                 | GGAAGAGGCAGTGGANCATTATGTG    | AATAATCTATAAAAGACGTTTGATGNGTGT        | 581                |
| <b>Poliovirus primers</b>  |                            |                              |                                       |                    |
| 5'UTR                      | EV-C 5UTR                  | GGTGTGAAGAGCCTATTGAGC        | GATTGTCACCATAAGCAGCCA                 | 186-189            |
| 2C                         | PV 2C-2                    | CATACAGTTCAAGAGCAAACACCGT    | ATATTGGGGTACTTGCTAG                   | 1317               |
| 3Dpol                      | PVs 3Dpol                  | GCAATGGGAAAGAAGAAGAGAGA      | GTGGTCTAAATCTATGCCCTTGTA              | 597                |
|                            | PV2 3Dpol                  | TTTGGGGACAGGGTGGATTAT        | CCGCCCTTGACACAGTATGTT                 | 83                 |
|                            | PV3 3Dpol                  | AGGAATCCAGGGGTCGCTACT        | CCGCCCTTGACACAGTATGTT                 | 257                |
| VP1                        | PV1-VP1-B                  | TGCGTGGCCATTATAACCGT         | CTGGAGCTGTTCCGTAGGTG                  | 319                |
|                            | PV2-VP1-C                  | CCGACAAAGCGCGCCAGCAG         | GTGAGCCGCGTGGGGTTGTG                  | 473                |
|                            | PV3-VP1-C                  | ACAACCAACCACCCGGGCACA        | ATGGCACTGAGATTCGCGCCG                 | 308                |

a. N = A+C+G+T; S = G+C; W = A+T.

Supplementary Table S4.

A) SYBR green PCR assay of quantitated pU57 DNA plasmids containing the 5'UTR region of four different enteroviruses<sup>a</sup>.

B) Enterovirus genome copy number/ml in medium of AV3 cell cultures infected with samples of selected PPS and T1D cases<sup>a</sup>.

| A) SYBR green PCR assay of quantitated pU57 plasmids containing the 5'UTR region of enteroviruses <sup>a</sup> |                                    |                             |      | B) Enterovirus genome copy number/ml in medium of AV3 cell cultures |                             |      |                                        |                                  |
|----------------------------------------------------------------------------------------------------------------|------------------------------------|-----------------------------|------|---------------------------------------------------------------------|-----------------------------|------|----------------------------------------|----------------------------------|
| pU57-5UTR plasmids                                                                                             | Input copy number per PCR reaction | Ct value <sup>b</sup> (n=3) |      | Samples from clinical cases                                         | Ct value <sup>b</sup> (n=3) |      | Calculated viral genome copy number/ml | Mean viral genome copy number/ml |
|                                                                                                                |                                    | Mean                        | SD   |                                                                     | Mean                        | SD   |                                        |                                  |
| Control buffer without template <sup>c</sup>                                                                   | 0                                  | >42,0                       | —    | Control medium of uninfected cell culture <sup>d</sup>              | >42,0                       | —    | —                                      | —                                |
| pU57 CV-A6                                                                                                     | 16,000                             | 24.3                        | 0.29 | PPS RBJ/va15                                                        | 38.2                        | 0.26 | 120                                    | 177                              |
|                                                                                                                | 1,600                              | 28.4                        | 0.35 | PPS GST/va11                                                        | 37.0                        | 0.18 | 230                                    |                                  |
|                                                                                                                | 160                                | 31.9                        | 0.60 | PPS CMP/va10                                                        | 37.4                        | 1.15 | 220                                    |                                  |
|                                                                                                                | 16                                 | 36.4                        | 1.28 | PPS CCM/va11                                                        | 38.8                        | 2.01 | 140                                    |                                  |
|                                                                                                                | 1.6                                | 39.8                        | 0.69 |                                                                     |                             |      |                                        |                                  |
| pU57 CV-B3                                                                                                     | 16,000                             | 23.5                        | 1.21 | T1D MZA/va15                                                        | 37.4                        | 0.61 | 220                                    | 470                              |
|                                                                                                                | 1,600                              | 27.8                        | 2.51 | T1D BRJ/va10                                                        | 36.1                        | 5.73 | 440                                    |                                  |
|                                                                                                                | 160                                | 30.9                        | 2.65 | T1D NPD/va14                                                        | 35.1                        | 2.29 | 620                                    |                                  |
|                                                                                                                | 16                                 | 35.4                        | 4.46 | T1D GRG/va12                                                        | 35.3                        | 0.51 | 600                                    |                                  |
|                                                                                                                | 1.6                                | 40.6                        | 2.66 |                                                                     |                             |      |                                        |                                  |
| pU57 PV-1                                                                                                      | 16,000                             | 24.9                        | 1.21 |                                                                     |                             |      |                                        |                                  |
|                                                                                                                | 1,600                              | 29.2                        | 0.41 |                                                                     |                             |      |                                        |                                  |
|                                                                                                                | 160                                | 33.8                        | 2.24 |                                                                     |                             |      |                                        |                                  |
|                                                                                                                | 16                                 | 38.1                        | 1.33 |                                                                     |                             |      |                                        |                                  |
|                                                                                                                | 1.6                                | 40.4                        | 4.21 |                                                                     |                             |      |                                        |                                  |
| pU57 EV-D68                                                                                                    | 16,000                             | 24.5                        | 0.86 |                                                                     |                             |      |                                        |                                  |
|                                                                                                                | 1,600                              | 28.5                        | 0.99 |                                                                     |                             |      |                                        |                                  |
|                                                                                                                | 160                                | 32.4                        | 0.89 |                                                                     |                             |      |                                        |                                  |
|                                                                                                                | 16                                 | 36.8                        | 0.85 |                                                                     |                             |      |                                        |                                  |
|                                                                                                                | 1.6                                | 40.0                        | 3.39 |                                                                     |                             |      |                                        |                                  |

a. SYBR green PCR assay run for 42 cycles using enterovirus EV 5UTR-Tok<sup>39</sup> primer pair.

b. Detection of the 5'UTR enterovirus target is expressed as the threshold cycle (Ct), an inverse correlate of the target sequence copy number.

c. Tris-EDTA buffer (low-EDTA).

d. Serum-supplemented DME/F12 medium of uninfected AV3 cells.

**Supplementary Figure S1.**

Uncropped images of 2.2% agarose gels represented in panel A of Figure 2 (end-point PCR with the 5UTR-Tok primer pair). Amplification of quantitated plasmids containing the 5'UTR region of CV-A6, CV-B3, PV1, EV-D68 enterovirus types. The first lane of each image contains a DNA ladder of the following composition (bottom up): 50bp, 100bp, 150bp, 200bp, 300bp, 500bp, 800bp, 1,500bp.

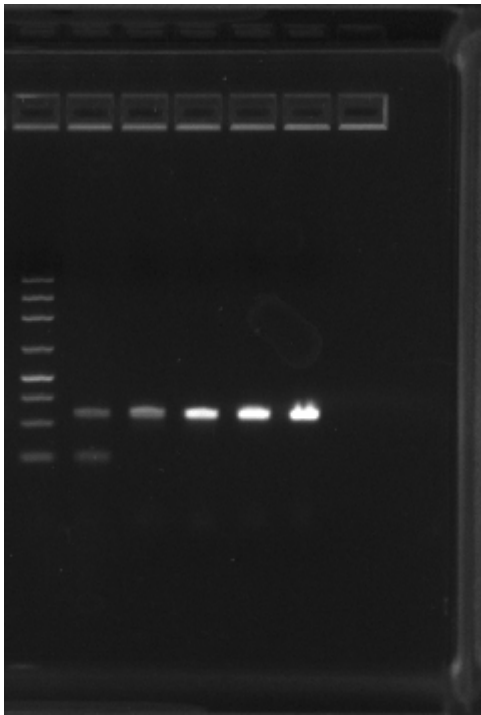

**CV-A6**

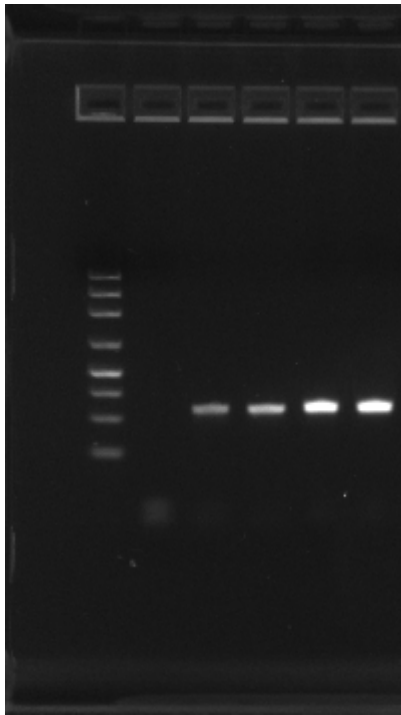

**CV-B3**

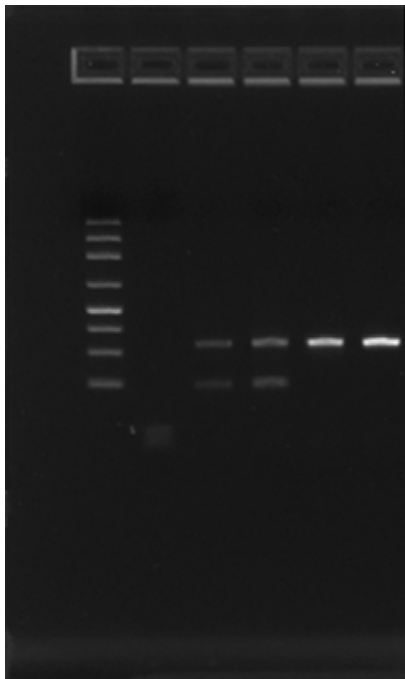

**PV1**

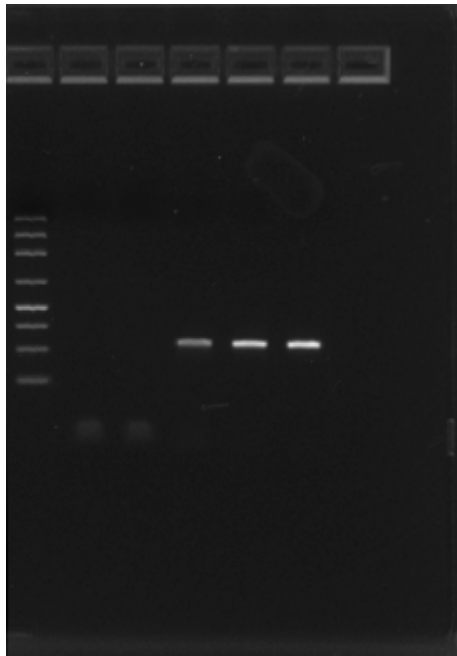

**EV-D68**

**Supplementary Figure S2.**

Uncropped images of 2.2% agarose gels represented in panel B of Figure 2 (end-point PCR with the 5UTR-C primer pair).

Amplification of quantitated plasmids containing the 5'UTR region of CV-A6, CV-B3, PV1, EV-D68 enterovirus types.

The first lane of each image contains a DNA ladder of the following composition (bottom up): 50bp, 100bp, 150bp, 200bp, 300bp, 500bp, 800bp, 1,500bp.

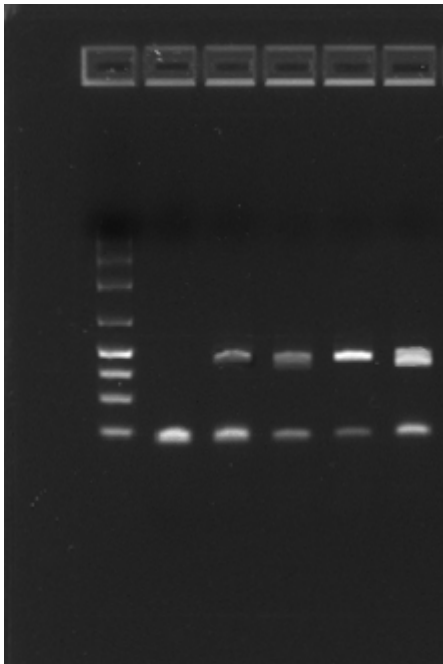

**CV-A6**

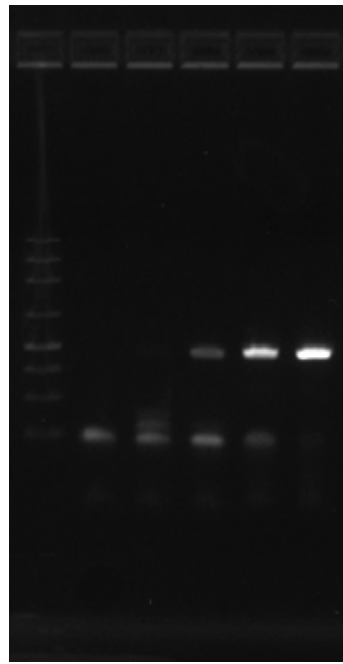

**CV-B3**

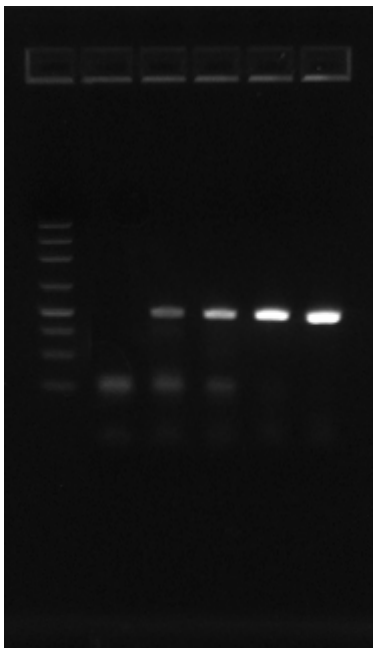

**PV1**

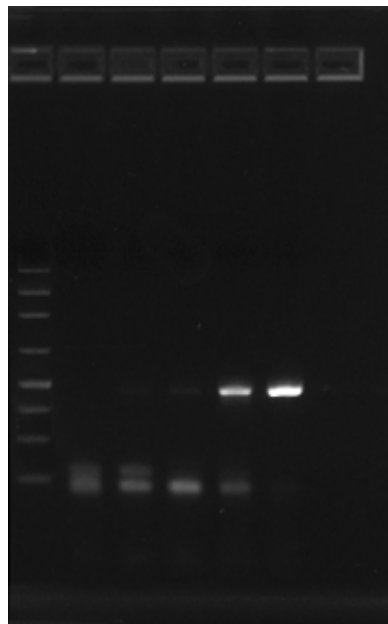

**EV-D68**
